# Supplementary material
Source: HighWire-hosted journal article supplement (https://drc.bmj.com/content/9/1/e002099)
Supplement: inline-supplementary-material-1 [file inline-supplementary-material-1.pdf]

**Supporting information:**

**Supplementary Figure 1.** Percentage of any fracture (A) and fall-related fractures (B) according to the duration of diabetes in Japanese patients with type 1 diabetes.

**Supplementary Figure 2.** Association between number of any fracture (A) or fall-related fractures (B) and history of severe hypoglycemia in Japanese patients with type 1 diabetes.

**Supplementary Table 1.** Adjusted odds ratios and 95% CIs for any fracture or fall-related fracture according to the combination of fall and severe hypoglycemia in patients with type 1 diabetes.

**Supplementary Table 2.** Adjusted odds ratios and 95% CIs for any fracture or fall-related fracture according to the presence of diabetic neuropathy in patients with type 1 diabetes.

**Supplementary Table 3.** Adjusted odds ratios and 95% CIs for any fracture or fall-related fracture according to the presence of diabetic retinopathy in patients with type 1 diabetes.

**Supplementary Table 4.** Adjusted odds ratios and 95% CIs for any fracture or fall-related fracture according to the presence of diabetic kidney disease in patients with type 1 diabetes.

**Supplementary Figure 1.** Percentage of any fracture (A) and fall-related fractures (B) according to the duration of diabetes in Japanese patients with type 1 diabetes.

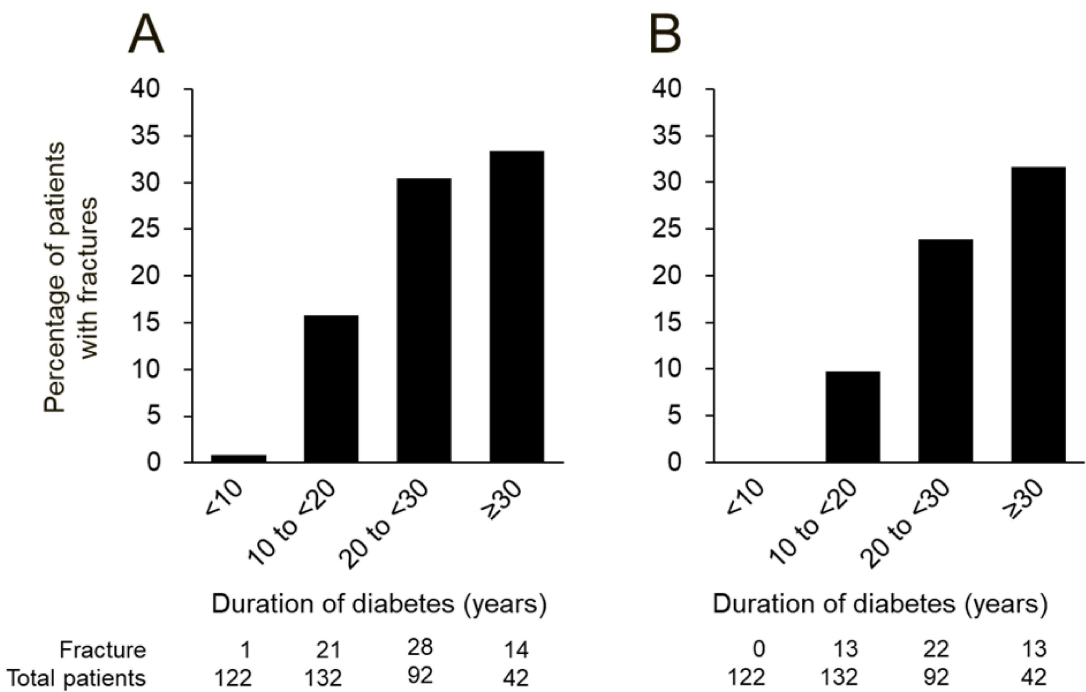

**A**

$P$  for trend < 0.001

History of severe hypoglycemia (%)

Number of fractures

| Number of fractures | Severe hypoglycemia (%) |
|---------------------|-------------------------|
| 0                   | ~37                     |
| 1                   | ~61                     |
| ≥ 2                 | ~78                     |

**B**

$P$  for trend = 0.001

History of severe hypoglycemia (%)

Number of fractures

| Number of fractures | Severe hypoglycemia (%) |
|---------------------|-------------------------|
| 0                   | ~39                     |
| 1                   | ~64                     |
| ≥ 2                 | ~67                     |

**Supplementary Table 1.** Adjusted odds ratios and 95% CIs for any fracture or fall-related fracture according to the combination of fall and severe hypoglycemia in patients with type 1 diabetes.

|                                                               | Any fracture                                       |                                                  | Fall-related fracture                              |                                                  |
|---------------------------------------------------------------|----------------------------------------------------|--------------------------------------------------|----------------------------------------------------|--------------------------------------------------|
|                                                               | Without combination of fall or severe hypoglycemia | With combination of fall and severe hypoglycemia | Without combination of fall or severe hypoglycemia | With combination of fall and severe hypoglycemia |
| Number of patients with fracture                              | 50                                                 | 14                                               | 35                                                 | 13                                               |
| Number of total patients                                      | 345                                                | 43                                               | 345                                                | 43                                               |
| Percentage of patients with fracture (%)                      | 14.5                                               | 32.6                                             | 10.1                                               | 30.2                                             |
| Odds ratio (95% CI)                                           |                                                    |                                                  |                                                    |                                                  |
| Unadjusted                                                    | 1.0 (ref.)                                         | 2.85 (1.38-5.69)                                 | 1.0 (ref.)                                         | 3.84 (1.79-7.93)                                 |
| Age-and sex-adjusted                                          | 1.0 (ref.)                                         | 2.68 (1.29-5.41)                                 | 1.0 (ref.)                                         | 3.72 (1.73-7.72)                                 |
| Multivariate adjusted                                         | 1.0 (ref.)                                         | 2.36 (1.04-5.18)                                 | 1.0 (ref.)                                         | 3.44 (1.47-7.88)                                 |
| Multivariate adjusted + neuropathy, diabetic retinopathy, DKD | 1.0 (ref.)                                         | 2.45 (1.08-5.43)                                 | 1.0 (ref.)                                         | 3.59 (1.51-8.31)                                 |

Multivariate adjustments include age, sex, BMI, diabetes duration, current smoking habit, current drinking habit, exercise habit, family history of hip fracture, weight loss, and hemoglobin A<sub>1c</sub>; DKD, diabetic kidney disease.

**Supplementary Table 2.** Adjusted odds ratios and 95% CIs for any fracture or fall-related fracture according to the presence of diabetic neuropathy in patients with type 1 diabetes

|                                                                              | Any fracture       |                  | Fall-related fracture |                  |
|------------------------------------------------------------------------------|--------------------|------------------|-----------------------|------------------|
|                                                                              | Without neuropathy | With neuropathy  | Without neuropathy    | With neuropathy  |
| Number of patients with fracture                                             | 44                 | 20               | 32                    | 16               |
| Number of total patients                                                     | 301                | 87               | 301                   | 87               |
| Percentage of patients with fracture (%)                                     | 14.6               | 23.0             | 10.6                  | 18.4             |
| Odds ratio (95% CI)                                                          |                    |                  |                       |                  |
| Unadjusted                                                                   | 1.0 (ref.)         | 1.74 (0.95-3.12) | 1.0 (ref.)            | 1.89 (0.97-3.60) |
| Age-and sex-adjusted                                                         | 1.0 (ref.)         | 2.14 (1.02-4.51) | 1.0 (ref.)            | 2.12 (0.94-4.77) |
| Multivariate adjusted                                                        | 1.0 (ref.)         | 1.36 (0.59-3.12) | 1.0 (ref.)            | 1.33 (0.53-3.30) |
| Multivariate adjusted<br>+ diabetic retinopathy,<br>DKD, severe hypoglycemia | 1.0 (ref.)         | 1.21 (0.52-2.81) | 1.0 (ref.)            | 1.17 (0.46-2.95) |

Multivariate adjustments include age, sex, BMI, diabetes duration, current smoking habit, current drinking habit, exercise habit, family history of hip fracture, weight loss, and hemoglobin A<sub>1c</sub>; DKD, diabetic kidney disease.

**Supplementary Table 3.** Adjusted odds ratios and 95% CIs for any fracture or fall-related fracture according to the presence of diabetic retinopathy in patients with type 1 diabetes

|                                                              | Any fracture        |                  | Fall-related fracture |                  |
|--------------------------------------------------------------|---------------------|------------------|-----------------------|------------------|
|                                                              | Without retinopathy | With retinopathy | Without retinopathy   | With retinopathy |
| Number of patients with fracture                             | 31                  | 33               | 21                    | 27               |
| Number of total patients                                     | 258                 | 130              | 258                   | 130              |
| Percentage of patients with fracture (%)                     | 12.0                | 25.4             | 8.1                   | 20.8             |
| Odds ratio (95% CI)                                          |                     |                  |                       |                  |
| Unadjusted                                                   | 1.0 (ref.)          | 2.49 (1.45-4.31) | 1.0 (ref.)            | 2.96 (1.60-5.53) |
| Age-and sex-adjusted                                         | 1.0 (ref.)          | 3.36 (1.83-6.26) | 1.0 (ref.)            | 3.43 (1.79-6.91) |
| Multivariate adjusted                                        | 1.0 (ref.)          | 1.61 (0.77-3.37) | 1.0 (ref.)            | 1.50 (0.67-3.37) |
| Multivariate adjusted + neuropathy, DKD, severe hypoglycemia | 1.0 (ref.)          | 1.64 (0.77-3.53) | 1.0 (ref.)            | 1.44 (0.62-3.32) |

Multivariate adjustments include age, sex, BMI, diabetes duration, current smoking habit, current drinking habit, exercise habit, family history of hip fracture, weight loss, and hemoglobin A<sub>1c</sub>; DKD, diabetic kidney disease.

**Supplementary Table 4.** Adjusted odds ratios and 95% CIs for any fracture or fall-related fracture according to the presence of diabetic kidney disease in patients with type 1 diabetes

|                                                                      | Any fracture |                  | Fall-related fracture |                  |
|----------------------------------------------------------------------|--------------|------------------|-----------------------|------------------|
|                                                                      | Without DKD  | With DKD         | Without DKD           | With DKD         |
| Number of patients with fracture                                     | 48           | 16               | 34                    | 14               |
| Number of total patients                                             | 317          | 71               | 317                   | 71               |
| Percentage of patients with fracture (%)                             | 15.1         | 22.5             | 10.7                  | 19.7             |
| Odds ratio (95% CI)                                                  |              |                  |                       |                  |
| Unadjusted                                                           | 1.0 (ref.)   | 1.63 (0.84-3.03) | 1.0 (ref.)            | 2.04 (1.01-3.99) |
| Age-and sex-adjusted                                                 | 1.0 (ref.)   | 1.90 (0.96-3.65) | 1.0 (ref.)            | 2.16 (1.04-4.32) |
| Multivariate adjusted                                                | 1.0 (ref.)   | 1.14 (0.52-2.42) | 1.0 (ref.)            | 1.37 (0.59-3.07) |
| Multivariate adjusted + neuropathy, retinopathy, severe hypoglycemia | 1.0 (ref.)   | 0.95 (0.41-2.09) | 1.0 (ref.)            | 1.19 (0.49-2.77) |

Multivariate adjustment include age, sex, BMI, diabetes duration, current smoking habit, current drinking habit, exercise habit, family history of hip fracture, weight loss, hemoglobin A<sub>1c</sub>. DKD, diabetic kidney disease.
